# Supplementary material for: Two Novel Cognitive Behavioral Therapy–Based Mobile Apps for Agoraphobia: Randomized Controlled Trial
Source: PubMed Central journal article supplement (PMC5722980; doi:10.2196/jmir.7747), 2017-11-24
Supplement: jmir_v19i11e398_app1.pdf [file jmir_v19i11e398_app1.pdf]

## **Appendix 1 - Agoraphobia Free session outline**

### **Session 1**

- Diaphragmatic breathing training
- Explanation of exposure therapy
- Explanation of using diaphragmatic breathing when encountering anxiety as part of exposure
- Creation of hierarchy
- Once the hierarchy is established the user is able to track progress against it. The user is prompted to tackle each stage of the hierarchy at his/her own pace throughout all the following sessions.

### **Session 2**

- Explanation of common cognitive distortions
- Introduction to journaling
- Explanation of automatic negative thoughts with interactive example
- Introduction of the concept of formulation

### **Session 3**

- Explanation of the concept of distraction or shifting attention from anxiety-inducing thoughts
- Practice identifying automatic negative thoughts and cognitive distortions
- Practice identifying physical responses to negative thoughts
- Practice diaphragmatic breathing
- Practice a distraction technique
- Practice completing a journal entry

### **Session 4**

- Training in progressive deep muscle relaxation
- Practice identifying negative thoughts and cognitive distortions, physical sensations and resulting actions
- Practice distraction techniques
- Practice completing a journal entry
- Practice diaphragmatic breathing

### **Session 5**

- Training using music as a distraction

- Practice identifying negative thoughts and cognitive distortions, sensations and actions
- Practice completing a journal entry
- Practice with sample formulations using a case study

### **Session 6**

- Training to use self-suggestion/visualisation as an acute anxiety management technique
- Explanation of challenging cognitive distortions and automatic negative thoughts with practical exercise
- Practice completing a journal entry
- Training on how to start completing a self-formulation based on previous practice

### **Session 7**

- Training on meditation
- Practice formulation with a case vignette
- Practice completing a journal entry including challenging negative thoughts

### **Session 8**

- Practice formulation with a case vignette
- Progress on self-formulation if not completed
- Practice completing a journal entry
- Practice one relaxation technique

### **Session 9**

- Practice one relaxation technique
- Progress on self-formulation if not completed
- Complete a journal entry

### **Session 10**

- Full review of all content
- Full recap on progress to date
- Goal is to complete the hierarchy if not done already
- Relapse prevention plan

The app can then be used as a CBT journal and all relaxation and distraction techniques are available for the user to choose freely.
