# Supplementary material for: Two Novel Cognitive Behavioral Therapy–Based Mobile Apps for Agoraphobia: Randomized Controlled Trial
Source: PubMed Central journal article supplement (PMC5722980; doi:10.2196/jmir.7747), 2017-11-24

## Appendix 2 – Screenshots of Agoraphobia Free and Stress Free

Agoraphobia Free (A-C) and Stress Free (D-F)

A.

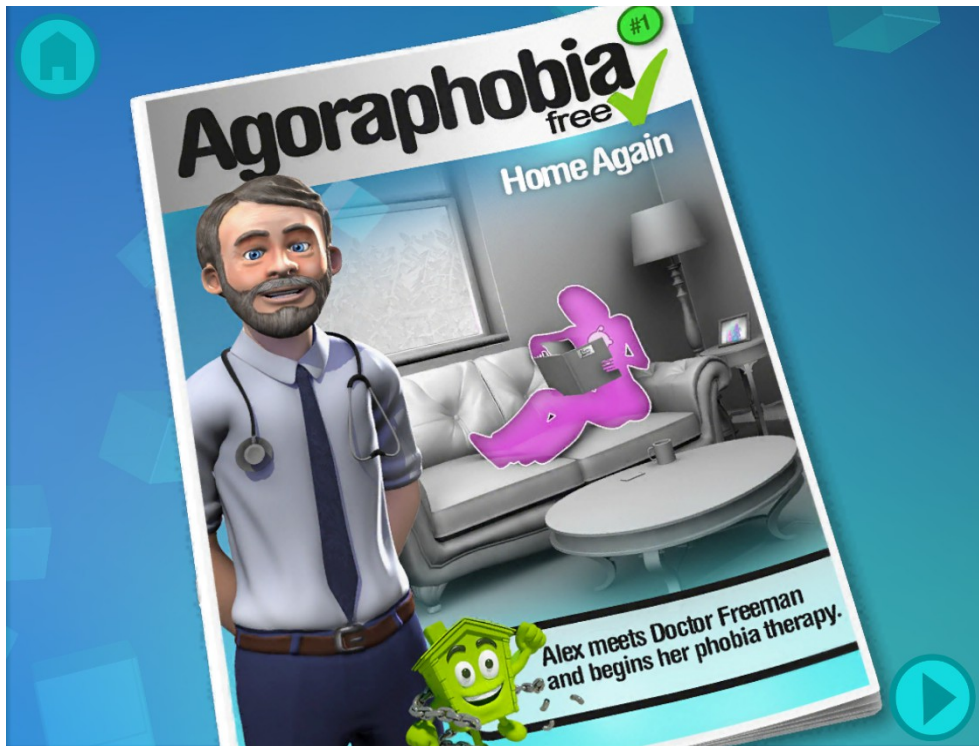

B.

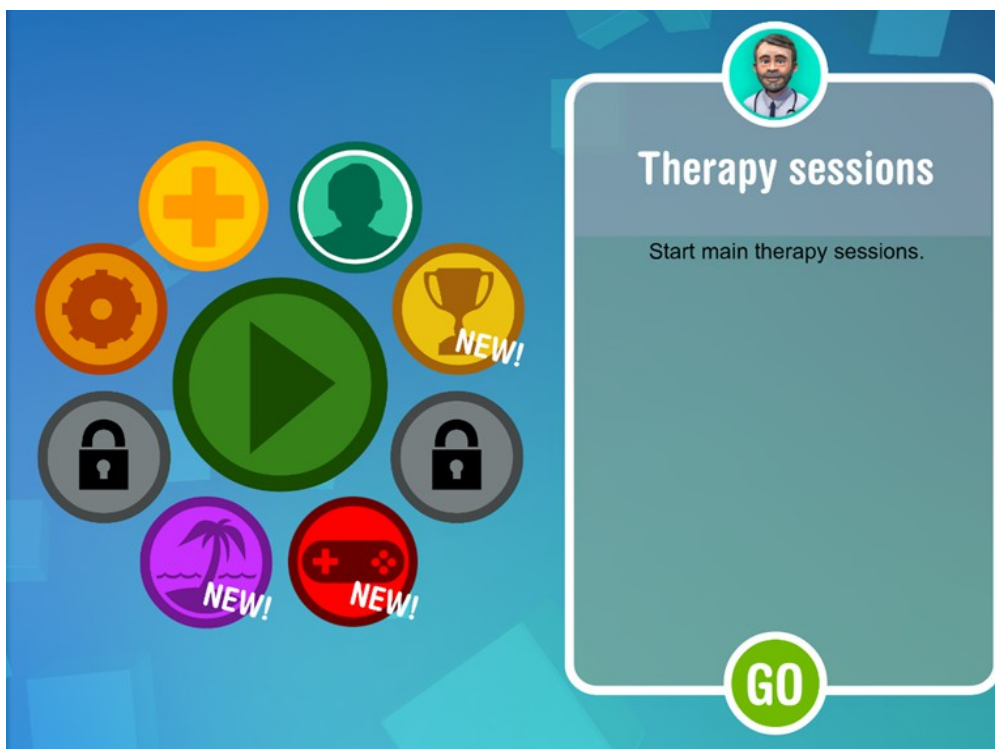

C.

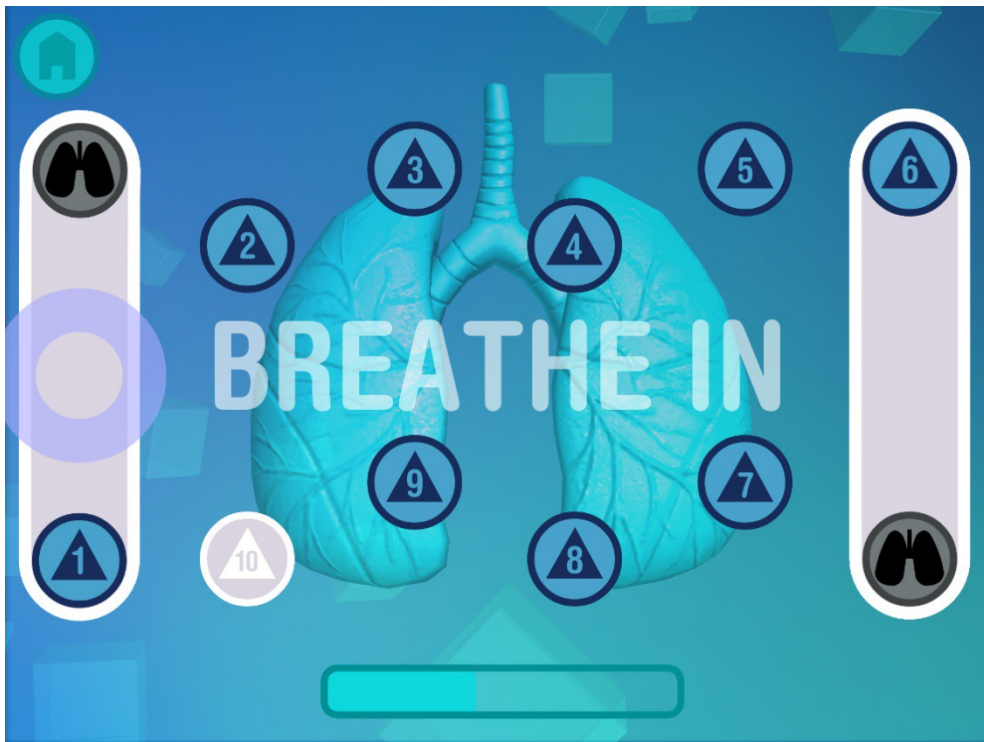

D.

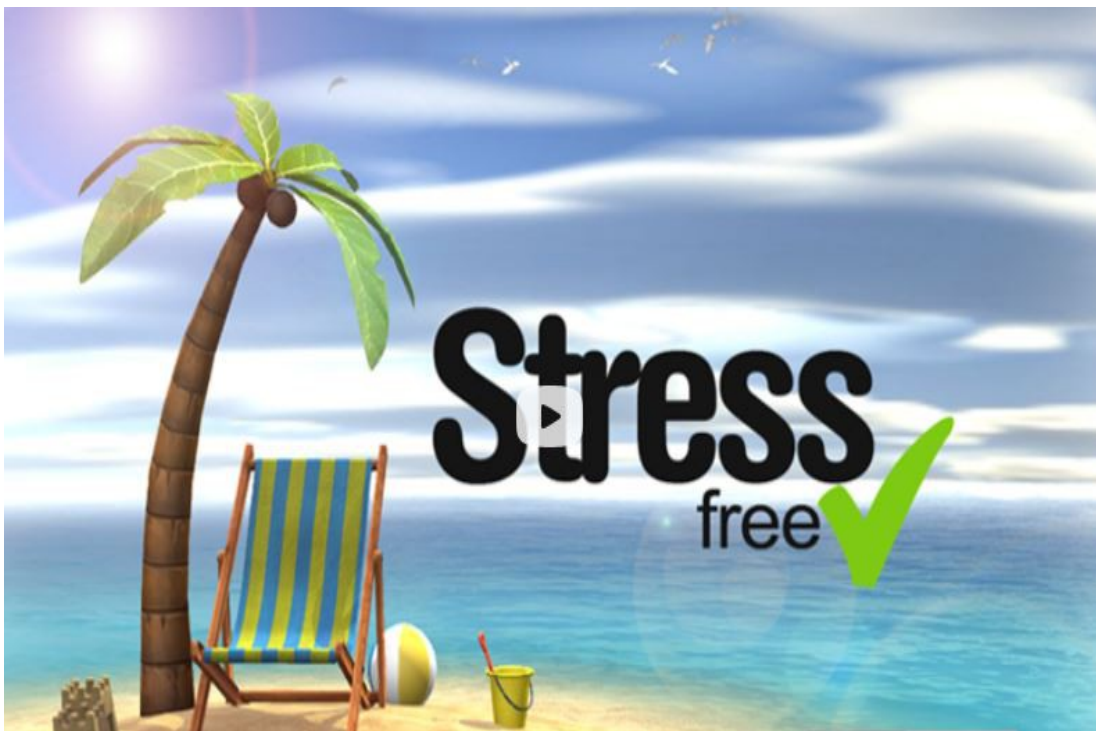

E.

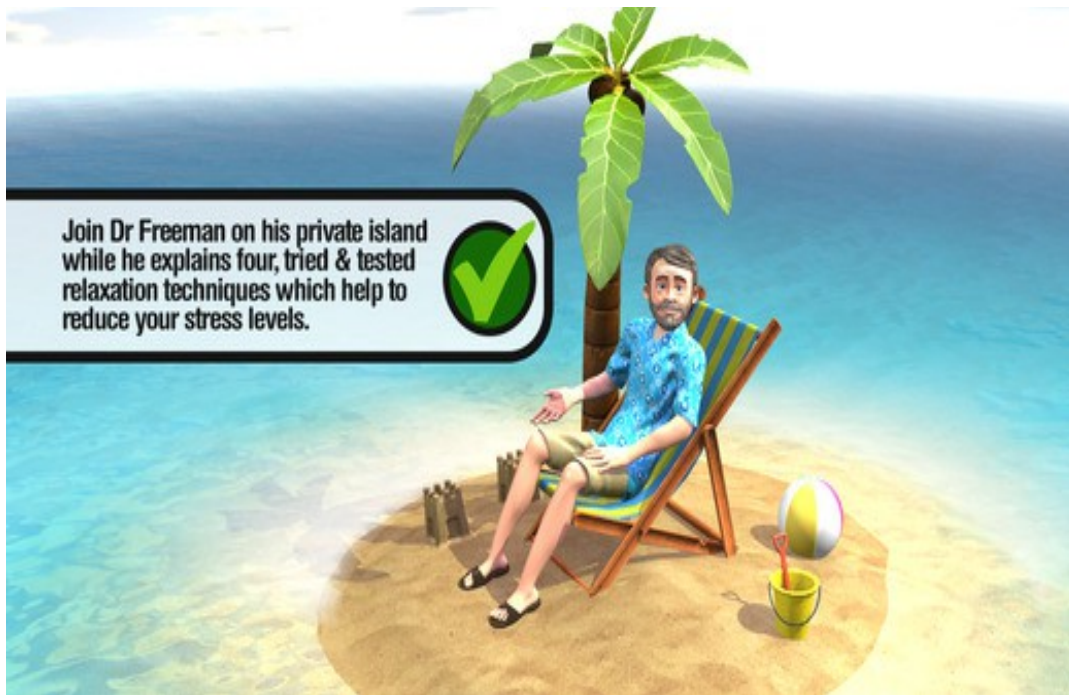

F.

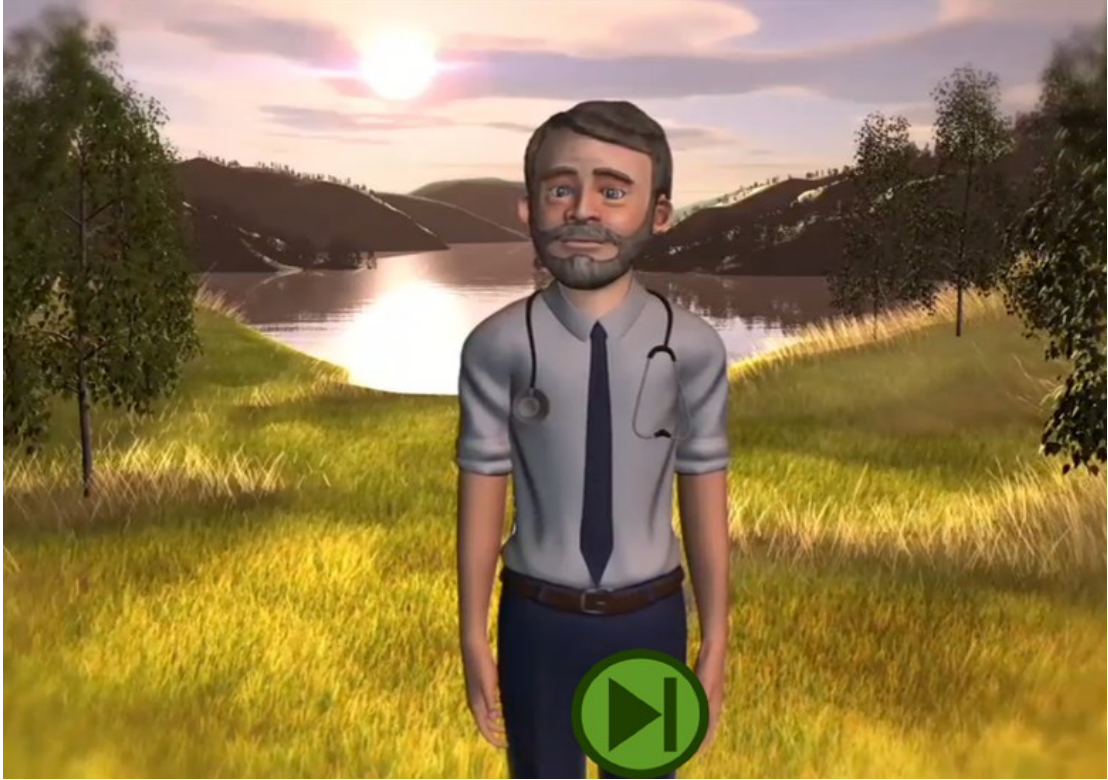

Supplement: jmir_v19i11e398_app2.pdf [file jmir_v19i11e398_app2.pdf]
